# Supplementary material for: A Quorum-Sensing-Induced Bacteriophage Defense Mechanism
Source: PubMed Central journal article supplement — mBio. 2013 Feb 19;4(1):e00362-12. doi: 10.1128/mBio.00362-12 (PMC3624510; doi:10.1128/mbio.00362-12), 2013-02-19
Supplement: mbo001131445st1.pdf [file mbo001131445st1.pdf]

| Genotype         |                                                                                         | Source or reference                                                            |
|------------------|-----------------------------------------------------------------------------------------|--------------------------------------------------------------------------------|
| <b>Strains</b>   |                                                                                         |                                                                                |
| BW25113          | $\Delta(araD-araB)567, \Delta lacZ4787(::rrnB-3), rph-1, \Delta(rhaD-rhaB)568, hsdR514$ | (Datsenko and Wanner 2000)                                                     |
| MG1655           | F', <i>rph-1</i>                                                                        | (52)                                                                           |
| JMØ3             | BW25113 $\lambda^{i434}$ single lysogen                                                 | This study                                                                     |
| JMØ11            | JMØ3 <i>rcaA::cat</i> #1                                                                | This study                                                                     |
| SLS4146          | JMØ3 <i>rcaA::cat</i> #2                                                                | This study                                                                     |
| SLS4147          | JMØ3 <i>rcaA::cat</i> #3                                                                | This study                                                                     |
| SLS4141          | BW25113 <i>lamB::cat</i>                                                                | This study                                                                     |
| SLS4143          | JMØ3 <i>lamB::cat</i>                                                                   | This study                                                                     |
| NMHK8            | BW25113 <i>sdiA::cat</i>                                                                | This study                                                                     |
| NL1A             | JMØ3 <i>sdiA::cat</i>                                                                   | This study                                                                     |
| S2775            | $\lambda^{ci857}$ temperature inducible single lysogen                                  | (53)                                                                           |
| KX1440           | MG1655 <i>lsrK::cat</i>                                                                 | K. Xavier lab collection,<br>constructed according to (54)                     |
| <b>Phages</b>    |                                                                                         |                                                                                |
| $\lambda^{i434}$ | $\lambda$ hybrid containing the immunity region of coliphage 434                        | (55).<br><br>Gift from Stanley Brown,<br>University of Copenhagen,<br>Denmark. |
| $\lambda^{vir}$  | virulent $\lambda$ mutant, which is insensitive to the CI repressor.                    | (56).<br><br>Gift from Stanley Brown,<br>University of Copenhagen,             |

|                 |                                                  |                                                             |
|-----------------|--------------------------------------------------|-------------------------------------------------------------|
|                 |                                                  | Denmark.                                                    |
| $\chi$          | Broad host range phage                           | Gift from Saeed Tawazoie,<br>Columbia University, USA. (27) |
| <b>Plasmids</b> |                                                  |                                                             |
| pKD46           | Expressing the $\lambda$ Red recombinase system  | (48)                                                        |
| pKD3            | Template for chloramphenicol resistance cassette | (48)                                                        |
