# Supplementary material for: A Quorum-Sensing-Induced Bacteriophage Defense Mechanism
Source: PubMed Central journal article supplement — mBio. 2013 Feb 19;4(1):e00362-12. doi: 10.1128/mBio.00362-12 (PMC3624510; doi:10.1128/mbio.00362-12), 2013-02-19
Supplement: mbo001131445st2.pdf [file mbo001131445st2.pdf]

| Target      | Forward Primer 5'-3'                                                         | Reverse Primer 5'-3'                                                          |
|-------------|------------------------------------------------------------------------------|-------------------------------------------------------------------------------|
| <i>Gene</i> |                                                                              |                                                                               |
| <i>rcsA</i> | CAGAGTAATCTTATTCAGCCTGACTGGTGGGAAACCA<br>CCAGTCAGATTGTGCATATGAATATCCTCCTTA   | GAAATATTCAGGTAAGGGGAATTATCGTTACGCATTGAG<br>TGAGGGTATGCCGTGTAGGCTGGAGCTGCTTC   |
| <i>lamB</i> | GCCTGTCACAGGTGATGTGAAAAAAGAAAAGCAATG<br>ACTCAGGAGATAGATGTGTAGGCTGGAGCTGCTTCG | GTTGGTTGCCGAATGCGGCGTAAACGCCTTATCCGGCCC<br>AGGTTTTGCTACATATGAATATCCTCCTTA     |
| <i>sdiA</i> | CGTGCCTTTCAGCCGGTTTTTGCATCTGGCACGCAGG<br>ACAGAAAAGAGACATATGAATATCCTCCTTA     | GTTTGAATTATCATTATAAATGATACTCACTCTCAGGGGC<br>GTTGCGGTTTACTGTGTAGGCTGGAGCTGCTTC |
